# Supplementary material
Source: Elsevier journal article supplement (https://www.sciencedirect.com/science/article/pii/S2173580817301049)
Supplement: mmc1 [file S2173580817301049:mmc1.pdf]

Nombre del paciente: \_\_\_\_\_ Nombre del evaluador: \_\_\_\_\_ Fecha: \_\_\_\_\_  
día mes año

La escala de puntuación ROSA le ayudará a valorar y a documentar hasta qué punto influye la enfermedad en las capacidades de su paciente en la vida diaria.

Para puntuar todas las afirmaciones (de la 1 a la 16) en relación con un paciente, marque con una cruz (x) cuál es la valoración que mejor describe las capacidades del paciente durante la última semana. Procure valorar meticulosamente cada afirmación. Puntúe todas las afirmaciones.

Antes de comenzar con la puntuación mediante la escala ROSA, determine **el grado** de afectación de la enfermedad de Alzheimer basándose en su impresión clínica global.

La enfermedad de Alzheimer del paciente está en ...

☐ fase temprana

☐ fase media

☐ fase tardía

Puntuación

1. El paciente puede recordar **acontecimientos que sucedieron hace mucho tiempo**.

muy bien ☐ ☐ ☐ ☐ ☐ ☐ ☐ ☐ ☐ ☐ ☐ ☐ ☐ ☐ ☐ ☐ ☐ ☐ ☐ muy mal/nada en absoluto

**Escenario:** El paciente se encuentra de pronto con un familiar cercano o con un buen amigo.

**Fase temprana:** El paciente reconoce al familiar/amigo, pero no sabe su nombre con exactitud.

**Fase media:** El paciente tiene problemas para recordar el nombre/ la relación con el familiar/amigo.

**Fase tardía:** El paciente tiene problemas para recordar el nombre/ la relación con el familiar/amigo. El paciente tiene problemas para recordar su propio nombre.

2. El paciente puede recordar **acontecimientos que sucedieron en un pasado cercano**.

muy bien ☐ ☐ ☐ ☐ ☐ ☐ ☐ ☐ ☐ ☐ ☐ ☐ ☐ ☐ ☐ ☐ ☐ ☐ muy mal/nada en absoluto

**Escenario:** El paciente quiere salir de casa, pero no puede recordar dónde están las llaves.

**Fase temprana:** El paciente busca las llaves durante varios minutos. El paciente no sale de casa sin llaves.

**Fase media:** El paciente sabe que tiene que hacer algo, pero sale de casa sin las llaves.

**Fase tardía:** Normalmente el paciente apenas puede acordarse de que debe llevar consigo la llave cuando sale de casa.

3. El paciente puede **planear y llevar a cabo procesos complejos**.

muy bien ☐ ☐ ☐ ☐ ☐ ☐ ☐ ☐ ☐ ☐ ☐ ☐ ☐ ☐ ☐ ☐ ☐ ☐ muy mal/nada en absoluto

**Escenario:** El paciente desea ir de compras/preparar la comida.

**Fase temprana:** El paciente puede ir de compras/preparar la comida con algo de ayuda o instrucciones.

**Fase media:** El paciente tiene grandes dificultades para ir de compras, pero puede preparar con ayuda una comida sencilla.

**Fase tardía:** El paciente necesita ayuda incluso para procesos sencillos.

4. El paciente puede **hacerse entender**.

muy bien ☐ ☐ ☐ ☐ ☐ ☐ ☐ ☐ ☐ ☐ ☐ ☐ ☐ ☐ ☐ ☐ ☐ ☐ muy mal/nada en absoluto

**Escenario:** El paciente quiere relatar algo.

**Fase temprana:** El paciente necesita algo de tiempo para encontrar las palabras adecuadas.

**Fase media:** El paciente no emplea las palabras correctas para lo que está pensando. Es difícil comprender lo que el paciente quiere decir.

**Fase tardía:** Aunque el paciente todavía puede hablar, tiene problemas para hacerse entender.

5. El paciente puede **comunicarse**.

muy bien ☐ ☐ ☐ ☐ ☐ ☐ ☐ ☐ ☐ ☐ ☐ ☐ ☐ ☐ ☐ ☐ ☐ ☐ muy mal/nada en absoluto

**Escenario:** El paciente quiere que alguien haga algo por él.

**Fase temprana:** El paciente expresa su deseo a menudo con claridad y apropiadamente y comprende la respuesta de la otra persona.

**Fase media:** El paciente tiene dificultades para expresar su deseo de manera equilibrada con una apropiada elección de las palabras y para comprender la respuesta de la otra persona.

**Fase tardía:** El paciente expresa su deseo mediante ruidos o gestos y apenas comprende la respuesta de la otra persona.

6. El paciente muestra **competencias sociales**.

muy bien ☐ ☐ ☐ ☐ ☐ ☐ ☐ ☐ ☐ ☐ ☐ ☐ ☐ ☐ ☐ ☐ ☐ ☐ muy mal/nada en absoluto

**Escenario:** El paciente desea establecer contacto con alguien.

**Fase temprana:** El paciente busca a alguien algunas veces que pueda pasar tiempo con él o llama a amigos/miembros de la familia que puedan pasar tiempo con él.

**Fase media:** El paciente necesita apoyo para dirigirse a alguien/conversar con alguien.

**Fase tardía:** En la mayoría de los casos el paciente no reacciona cuando alguien desea establecer contacto con él.

7. El paciente se comporta **agresivamente**.

nada en absoluto ☐ ☐ ☐ ☐ ☐ ☐ ☐ ☐ ☐ ☐ ☐ ☐ ☐ ☐ ☐ ☐ ☐ ☐ muy fuerte

**Escenario:** El paciente quiere algo/quiere que alguien haga algo por él, pero no lo consigue/la otra persona no lo hace.

**Fase temprana:** El paciente manifiesta su enfado por la situación con palabras.

**Fase media:** El paciente reacciona ante esta situación con gritos/palabrotas o con gestos amenazadores.

**Fase tardía:** El paciente estalla o en esta situación frecuentemente se vuelve violento.

+

Suma parcial (1):

8. El paciente se muestra **inquieto**.

nada en absoluto ☐ 10 ☐ 9 ☐ 8 ☐ 7 ☐ 6 ☐ 5 ☐ 4 ☐ 3 ☐ 2 ☐ 1 ☐ 0 muy fuerte

**Escenario:** El paciente permanece tranquilamente sentado.

**Fase temprana:** El paciente comienza a balbucear sin razón evidente o a balancear ligeramente el cuerpo.

**Fase media:** El paciente comienza a deambular repentinamente.

**Fase tardía:** El paciente no está en condiciones de permanecer sentado tranquilamente y muestra fases prolongadas en las que vaga de un lugar a otro y profiere improperios espontáneamente.

 
9. El paciente muestra alteraciones de comportamiento motivadas por **alucinaciones**.

nada en absoluto ☐ 10 ☐ 9 ☐ 8 ☐ 7 ☐ 6 ☐ 5 ☐ 4 ☐ 3 ☐ 2 ☐ 1 ☐ 0 muy fuerte

**Escenario:** El paciente muestra síntomas de alucinaciones/tiene la alucinación de que alguien le está robando dinero o que su propia casa o su pareja le son extraños.

**Fase temprana:** El paciente está convencido de que alguien le roba dinero.

**Fase media:** El paciente reacciona con enfado hacia la "falsa" pareja o intenta abandonar el "falso" hogar.

**Fase tardía:** El paciente reacciona violentamente hacia la "falsa" pareja o en el intento de impedirle abandonar el "falso" hogar.

 
10. El paciente se muestra **inseguro**.

nada en absoluto ☐ 10 ☐ 9 ☐ 8 ☐ 7 ☐ 6 ☐ 5 ☐ 4 ☐ 3 ☐ 2 ☐ 1 ☐ 0 muy fuerte

**Escenario:** El paciente no quiere quedarse solo en una situación no habitual.

**Fase temprana:** El paciente está agitado a veces o tiene miedo cuando se le deja sólo.

**Fase media:** El paciente está a menudo tenso, nervioso o tiene miedo si se le deja sólo.

**Fase tardía:** El paciente tiene a menudo mucho miedo, comienza a llorar o intenta retener a la otra persona.

 
11. El paciente se comporta **cooperativamente**.

muy bien ☐ 10 ☐ 9 ☐ 8 ☐ 7 ☐ 6 ☐ 5 ☐ 4 ☐ 3 ☐ 2 ☐ 1 ☐ 0 muy mal/nada en absoluto

**Escenario:** El paciente debe ir al médico/a dormir.

**Fase temprana:** Al paciente no le entusiasma tener que ir al médico/a dormir, pero a pesar de ello lo hace.

**Fase media:** Hay que convencer al paciente de que debe ir al médico/a dormir.

**Fase tardía:** El paciente se niega con vehemencia a ir al médico/a dormir y apenas se le puede convencer.

 
12. El paciente es **competente en la vida cotidiana**.

muy bien ☐ 10 ☐ 9 ☐ 8 ☐ 7 ☐ 6 ☐ 5 ☐ 4 ☐ 3 ☐ 2 ☐ 1 ☐ 0 muy mal/nada en absoluto

**Escenario:** El paciente quiere vestirse/comer algo.

**Fase temprana:** El paciente está en condiciones de elegir la ropa/comida con independencia y vestirse/comer.

**Fase media:** El paciente está en condiciones de ponerse ropa ya preparada/comer comida preparada con independencia.

**Fase tardía:** El paciente tiene grandes dificultades para vestirse/comer con independencia.

 
13. El paciente presta atención, muestra **interés por su entorno**.

muy fuerte ☐ 10 ☐ 9 ☐ 8 ☐ 7 ☐ 6 ☐ 5 ☐ 4 ☐ 3 ☐ 2 ☐ 1 ☐ 0 muy débil

**Escenario:** El paciente se interesa por los sucesos del día (Familia/deportes/bolsa de valores/...).

**Fase temprana:** El paciente sigue los sucesos del día (...) por la TV/Radio y habla de ellos con los demás.

**Fase media:** El paciente habla de los sucesos del día (...), si se le habla de ellos.

**Fase tardía:** Aun cuando se cuente algo al paciente acerca de los sucesos del día (...), a menudo no reacciona.

 
14. El paciente es **independiente**.

muy fuerte ☐ 10 ☐ 9 ☐ 8 ☐ 7 ☐ 6 ☐ 5 ☐ 4 ☐ 3 ☐ 2 ☐ 1 ☐ 0 nada en absoluto

**Escenario:** El paciente quiere ir a alguna parte o quiere hacer algo.

**Fase temprana:** El paciente determina con independencia a dónde desea ir, qué quiere hacer y va/lo hace con algo de ayuda.

**Fase media:** El paciente necesita que se le avise y ayuda para ir a cualquier parte/ hacer algo.

**Fase tardía:** El propio paciente apenas puede ir a alguna parte/hacer algo incluso en compañía de otra persona.

 

## 15. La calidad de vida del paciente es

muy buena ☐ 10 ☐ 9 ☐ 8 ☐ 7 ☐ 6 ☐ 5 ☐ 4 ☐ 3 ☐ 2 ☐ 1 ☐ 0 muy mala

 

## 16. La carga para la persona a su cuidado es

muy baja ☐ 10 ☐ 9 ☐ 8 ☐ 7 ☐ 6 ☐ 5 ☐ 4 ☐ 3 ☐ 2 ☐ 1 ☐ 0 muy alta

 

Suma parcial (2):

 

Suma parcial (1):

 

+

La puntuación total se sitúa entre 0 y 160

Puntuación total:

 

+
